# Supplementary material for: Comparative Efficacy of Different Amoxicillin Dosing Regimens in Preventing Early Implant Failure—A Systematic Review with Network Meta-Analysis
Source: MDPI journal article supplement (doi:10.3390/antibiotics12030512), 2023-03-03

Supplementary Table S1. Abbreviations

| Abbreviation | Full text                                                                                           |
|--------------|-----------------------------------------------------------------------------------------------------|
| PLA          | placebo/ no antibiotics                                                                             |
| PRE1         | 2 g amoxicillin 1 hr pre-op                                                                         |
| PRE2         | 1 g amoxicillin pre-op                                                                              |
| PRE3         | 3 g amoxicillin 1 hr pre-op                                                                         |
| POST1        | 2 g amoxicillin immediately post-op                                                                 |
| POST2        | Post-op amoxicillin with clavulanic acid 625 mg 3x daily for 5 days                                 |
| POST3        | 500 mg q 8 h for 5 days post-op/postoperative amoxicillin, 1 g twice a day for 1 week after surgery |
| PREPO1       | 2 g amoxicillin pre-op and 500 mg amoxicillin post-op for 3 days                                    |
| PREPO2       | 2 g amoxicillin 1 hr pre-op followed by 500 mg three times for 7 days                               |
| PREPO3       | 2 g amoxicillin 1 hr pre-op, 500 mg q 8 h for 5 days                                                |
| PREPO4       | 2 g amoxicillin 1 hr pre-op followed by placebo post-op                                             |
| PREPO5       | 2 g amoxicillin pre-op and 1 g amoxicillin postoperative, and 1 g twice a day for 2 days later      |
| PREPO6       | 1 g amoxicillin pre-op and 500 mg amoxicillin post-op for 3 days                                    |
| PREPO7       | 1 g amoxicillin 1 hr pre-op and 500 mg 4x daily for 2 days post-op                                  |
| PREPO8       | 2 g amoxicillin 1 hr pre-op, followed by postoperative 1 g amoxicillin twice a day for 7 days       |
| PREPO9       | 2 g amoxicillin 1 hr pre-op, followed by postoperative 500 mg thrice for 5 days                     |
| NMA          | Network meta-analysis                                                                               |
| SUCRA        | Surface under cumulative ranking                                                                    |
| RoB          | Risk of bias                                                                                        |
| PRISMA       | Preferred Reporting Items for Systematic Reviews and Meta-Analyses                                  |
| RR           | Relative Risk                                                                                       |
| CI           | Confidence Interval                                                                                 |

Supplementary Table S2. Risk of bias assessment of included studies.

| Author           | Year | Random Sequence | Allocation Concealment | Blinding of Participants | Blinding of Outcome Assessment (Detection Bias) | Incomplete Outcome | Selective Reporting | Other Bias | Overall Bias |
|------------------|------|-----------------|------------------------|--------------------------|-------------------------------------------------|--------------------|---------------------|------------|--------------|
| Momand et al.    | 2022 | -               | -                      | -                        | -                                               | -                  | -                   | -          | -            |
| Tabrizi et al.   | 2022 | -               | -                      | ?                        | -                                               | -                  | -                   | -          | ?            |
| Payer et al.     | 2020 | -               | -                      | -                        | -                                               | +                  | +                   | -          | +            |
| Kashani et al.   | 2019 | +               | ?                      | +                        | ?                                               | -                  | -                   | -          | +            |
| Andrade et al.   | 2017 | -               | ?                      | ?                        | ?                                               | -                  | ?                   | ?          | ?            |
| Arduino et al.   | 2015 | -               | -                      | +                        | +                                               | +                  | -                   | -          | +            |
| Nolan et al.     | 2014 | -               | -                      | -                        | -                                               | +                  | -                   | -          | +            |
| Tan et al.       | 2014 | -               | -                      | -                        | -                                               | -                  | -                   | -          | -            |
| El-Kholey et al. | 2014 | -               | -                      | -                        | -                                               | -                  | +                   | -          | +            |
| Karaky et al.    | 2011 | +               | +                      | +                        | -                                               | +                  | ?                   | +          | +            |
| Caiazzo et al.   | 2011 | -               | ?                      | +                        | +                                               | -                  | -                   | +          | +            |
| Esposito et al.  | 2010 | -               | -                      | -                        | -                                               | -                  | -                   | -          | -            |
| Anitua et al.    | 2009 | -               | -                      | -                        | -                                               | -                  | -                   | -          | -            |
| Abu-Ta'a et al.  | 2008 | -               | -                      | +                        | -                                               | -                  | -                   | ?          | +            |
| Esposito et al.  | 2008 | -               | -                      | -                        | -                                               | -                  | -                   | +          | +            |

Supplementary Table S3. Results of network meta-analysis from sensitivity analysis: implant failure (per patient data)

| Treatment | Implant failure (patient) |         |                    |
|-----------|---------------------------|---------|--------------------|
|           | Relative risk (95% CI)    | P-value | SUCRA rank (score) |
| POST1     | 0.32 (0.01,7.86)          | 0.490   | 1 (73.8)           |
| POST3     | 1.89 (0.07,49.63)         | 0.702   | 4 (41.1)           |
| PRE1      | 0.63 (0.31,1.26)          | 0.192   | 3 (68.0)           |
| PREPO1    | 0.31 (0.12,7.50)          | 0.472   | 2 (73.6)           |
| PREPO2    | 4.96 (0.24,100.29)        | 0.296   | 6 (20.3)           |
| PREPO3    | 3.15 (0.14,70.43)         | 0.469   | 5 (25.4)           |

Abbreviations: PLA = placebo/no antibiotics; PRE1 = 2 g amox 1 hr pre-op; POST1 = 2 g amox immediately post-op; POST3 = 500 mg q 8 h for 5 days post-op/postoperative amox 1 g twice a day for 1 week after surgery; PREPO1 = 2g amox pre-op and 500 mg amox post-op for 3 days; PREPO2 = 2 g amox 1 hr pre-op followed by 500 mg three times for 7 days; PREPO3 = 2 g amox 1 hr pre-op, 500 mg q 8 h for 5 days

Supplementary Table S4. Results of network meta-analysis: prosthetic failure (patient)

| Treatment | Prosthetic failure (Patient) |         |                    |
|-----------|------------------------------|---------|--------------------|
|           | Relative risk (95% CI)       | P-value | SUCRA rank (score) |
| PRE1      | 0.43 (0.16,1.11)             | 0.082   | 1 (89.7)           |
| PREPO5    | 2.02 (0.08,48.38)            | 0.663   | 2 (25.4)           |

Abbreviations: PRE1 = 2 g amox 1 hr pre-op; PREPO5 = 2 g amox pre-op and 1 g amox postoperative, and 1 g twice a day for 2 days later

Supplementary Table S5. Results of network meta-analysis: postsurgical complications

| Treatment | Postsurgical Complications |         |                    |
|-----------|----------------------------|---------|--------------------|
|           | Relative risk (95% CI)     | P-value | SUCRA rank (score) |
| POST1     | 2.27 (0.21,24.20)          | 0.495   | 10 (22.6)          |
| POST2     | 0.61 (0.04,8.53)           | 0.714   | 4 (59.6)           |
| POST3     | 0.75 (0.25,2.20)           | 0.604   | 5 (57.0)           |
| PRE1      | 0.90 (0.52,1.57)           | 0.734   | 6 (49.2)           |
| PRE3      | 0.20 (0.01,4.12)           | 0.302   | 2 (80.2)           |
| PREPO1    | 1.89 (0.24,14.35)          | 0.537   | 8 (26.9)           |
| PREPO3    | 1.14 (0.41,3.12)           | 0.797   | 7 (37.7)           |
| PREPO5    | 0.56 (0.14,2.22)           | 0.417   | 3 (66.9)           |
| PREPO7    | 0.25 (0.02,2.13)           | 0.206   | 1 (81.1)           |

|        |                   |       |          |
|--------|-------------------|-------|----------|
| PREPO9 | 1.90 (0.27,13.02) | 0.511 | 9 (25.2) |
|--------|-------------------|-------|----------|

Abbreviations: PRE1 = 2 g amox 1 hr pre-op; PRE3 = 3 g amox 1 hr pre-op; POST1 = 2 g amox immediately post-op; POST2 = post-op amox with clavulanic acid 625 mg 3x daily for 5 days; POST3 = 500 mg q 8 h for 5 days post-op/postoperative amox 1 g twice a day for 1 week after surgery; PREPO1 = 2 g amox pre-op and 500 mg amox post-op for 3 days; PREPO3 = 2 g amox 1 hr pre-op, 500 mg q 8 h for 5 days; PREPO5 = 2 g amox pre-op and 1 g amox postoperative, and 1 g twice a day for 2 days later; PREPO7 = 1 g amox 1 hr pre-op and 500 mg 4x daily for 2 days post-op; PREPO9 = 2 g amox 1 hr pre-op, followed by postoperative 500 mg thrice for 5 days

Supplementary Table S6. Results of network meta-analysis: adverse effect

| Treatment | Adverse effect         |         |                    |
|-----------|------------------------|---------|--------------------|
|           | Relative risk (95% CI) | P-value | SUCRA rank (score) |
| POST2     | -0.18 (-4.46,4.09)     | 0.934   | 2 (64.7)           |
| PRE1      | 0 (-1.74,1.75)         | 0.998   | 1 (66.5)           |
| PREPO1    | 0 (-4.25,4.26)         | 0.999   | 3 (61.9)           |
| PREPO2    | 2.31 (-1.05,5.68)      | 0.178   | 7 (21.1)           |
| PREPO5    | 1.88 (-1.54,5.31)      | 0.282   | 6 (27.4)           |
| PREPO7    | 0 (-3.89,3.89)         | 1.000   | 4 (59.8)           |
| PREPO9    | 1.53 (-1.95,5.02)      | 0.389   | 5 (32.3)           |

Abbreviations:

PRE1

= 2 g amox 1 hr pre-op; POST2 = post-op amox with clavulanic acid 625 mg 3x daily for 5 days; PREPO1 = 2 g amox pre-op and 500 mg amox post-op for 3 days; PREPO2 = 2 g amox 1 hr pre-op followed by 500 mg three times for 7 days; PREPO5 = 2 g amox pre-op and 1 g amox postoperative, and 1 g twice a day for 2 days later; PREPO7 = 1 g amox 1 hr pre-op and 500 mg 4x daily for 2 days post-op; PREPO9 = 2 g amox 1 hr pre-op, followed by postoperative 500 mg thrice for 5 days.

Supplementary Table S7. Network consistency for implant failure (patient), implant failure (implant), prosthetic failure (patient), postsurgical complications, and adverse effects

| Category                     | Testing for inconsistency |                 |
|------------------------------|---------------------------|-----------------|
|                              | Chi-square ( $\chi^2$ )   | Prob > $\chi^2$ |
| Implant failure (patient)    | 4.54                      | 0.1033          |
| Implant failure (implant)    | 1.53                      | 0.4645          |
| Prosthetic failure (patient) | 1.00                      | 0.3172          |
| Postsurgical complications   | 0.51                      | 0.9722          |
| Adverse effects              | 1.56                      | 0.2120          |

Supplementary Figure S1. Pairwise meta-analysis: implant failure (per patient data)

| Study                                              | exp(ES)                                            | [95% conf. interval]                               |                                                    | % weight                                      |
|----------------------------------------------------|----------------------------------------------------|----------------------------------------------------|----------------------------------------------------|-----------------------------------------------|
| Group: POST.. PLA<br>6                             | 0.325                                              | 0.013                                              | 7.869                                              | 1.14                                          |
| exp(theta)                                         | 0.325                                              | 0.013                                              | 7.869                                              |                                               |
| Group: PRE1.. P~2<br>7                             | 1.113                                              | 0.541                                              | 2.288                                              | 13.38                                         |
| exp(theta)                                         | 1.113                                              | 0.541                                              | 2.288                                              |                                               |
| Group: PRE1.. P~3<br>2                             | 0.333                                              | 0.014                                              | 8.118                                              | 1.13                                          |
| exp(theta)                                         | 0.333                                              | 0.014                                              | 8.118                                              |                                               |
| Group: PRE1.. PLA<br>3<br>5<br>9<br>10<br>11<br>13 | 0.381<br>0.032<br>0.420<br>1.019<br>0.250<br>0.846 | 0.195<br>0.002<br>0.150<br>0.149<br>0.054<br>0.289 | 0.744<br>0.564<br>1.175<br>6.968<br>1.159<br>2.481 | 14.55<br>1.40<br>8.35<br>2.94<br>4.39<br>7.81 |
| exp(theta)                                         | 0.429                                              | 0.251                                              | 0.733                                              |                                               |
| Group: PRE3.. P~1<br>5                             | 2.929                                              | 0.059                                              | 144.156                                            | 0.77                                          |
| exp(theta)                                         | 2.929                                              | 0.059                                              | 144.156                                            |                                               |
| Group: PRE3.. PLA<br>5                             | 0.094                                              | 0.005                                              | 1.625                                              | 1.41                                          |
| exp(theta)                                         | 0.094                                              | 0.005                                              | 1.625                                              |                                               |
| Group: PREP.. P~1<br>6                             | 0.954                                              | 0.019                                              | 47.527                                             | 0.76                                          |
| exp(theta)                                         | 0.954                                              | 0.019                                              | 47.527                                             |                                               |
| Group: PREP.. PLA<br>6<br>12                       | 0.310<br>3.051                                     | 0.013<br>0.322                                     | 7.510<br>28.913                                    | 1.14<br>2.20                                  |
| exp(theta)                                         | 1.301                                              | 0.149                                              | 11.352                                             |                                               |
| Group: PREP.. P~1<br>15                            | 7.875                                              | 0.423                                              | 146.697                                            | 1.34                                          |
| exp(theta)                                         | 7.875                                              | 0.423                                              | 146.697                                            |                                               |
| Group: PREP.. P~3<br>2                             | 1.667                                              | 0.223                                              | 12.459                                             | 2.71                                          |
| exp(theta)                                         | 1.667                                              | 0.223                                              | 12.459                                             |                                               |
| Group: PREP.. P~1<br>2                             | 5.000                                              | 0.242                                              | 103.277                                            | 1.25                                          |
| exp(theta)                                         | 5.000                                              | 0.242                                              | 103.277                                            |                                               |
| Group: PREP.. P~1<br>4                             | 0.938                                              | 0.277                                              | 3.181                                              | 6.41                                          |
| exp(theta)                                         | 0.938                                              | 0.277                                              | 3.181                                              |                                               |
| Group: PREP.. PLA<br>14                            | 0.143                                              | 0.008                                              | 2.679                                              | 1.33                                          |
| exp(theta)                                         | 0.143                                              | 0.008                                              | 2.679                                              |                                               |
| Group: PREP.. P~2<br>7                             | 0.943                                              | 0.448                                              | 1.982                                              | 12.90                                         |
| exp(theta)                                         | 0.943                                              | 0.448                                              | 1.982                                              |                                               |
| Group: PREP.. P~1<br>7                             | 0.847                                              | 0.399                                              | 1.800                                              | 12.69                                         |
| exp(theta)                                         | 0.847                                              | 0.399                                              | 1.800                                              |                                               |
| Overall<br>exp(theta)                              | 0.700                                              | 0.495                                              | 0.990                                              |                                               |

Supplementary Figure S2. Sensitivity analysis network plot : implant failure (per patient data)

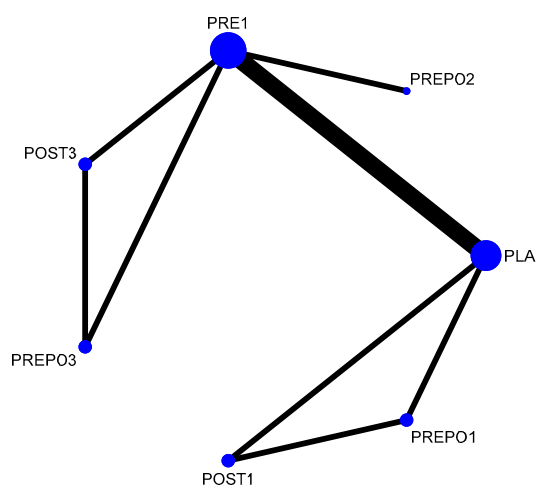

Abbreviations: PLA = placebo/no antibiotics; PRE1 = 2 g amox 1 hr pre-op; POST1 = 2 g amox immediately post-op; POST3 = 500 mg q 8 h for 5 days post-op/postoperative amox 1 g twice a day for 1 week after surgery; PREPO1 = 2 g amox pre-op and 500 mg amox post-op for 3 days; PREPO2 = 2 g amox 1 hr pre-op followed by 500 mg three times for 7 days; PREPO3 = 2 g amox 1 hr pre-op, 500 mg q 8 h for 5 days

Supplementary Figure S3. Sensitivity analysis network plot : implant failure (per implant data)

| Study                                        | exp(ES)                                   | [95% conf. interval]                      |                                           | % weight                               |
|----------------------------------------------|-------------------------------------------|-------------------------------------------|-------------------------------------------|----------------------------------------|
| Group: POST.. PLA<br>8                       | 0.122                                     | 0.006                                     | 2.465                                     | 1.31                                   |
| exp(theta)                                   | 0.122                                     | 0.006                                     | 2.465                                     |                                        |
| Group: PRE1.. P~2<br>7                       | 1.289                                     | 0.636                                     | 2.612                                     | 13.66                                  |
| exp(theta)                                   | 1.289                                     | 0.636                                     | 2.612                                     |                                        |
| Group: PRE1.. P~3<br>2<br>8                  | 0.333<br>1.361                            | 0.014<br>0.028                            | 8.118<br>66.990                           | 1.17<br>0.79                           |
| exp(theta)                                   | 0.587                                     | 0.050                                     | 6.931                                     |                                        |
| Group: PRE1.. PLA<br>3<br>8<br>9<br>10<br>13 | 0.300<br>0.167<br>0.532<br>1.019<br>1.029 | 0.156<br>0.008<br>0.214<br>0.149<br>0.390 | 0.575<br>3.339<br>1.322<br>6.968<br>2.715 | 14.90<br>1.32<br>10.01<br>3.01<br>9.18 |
| exp(theta)                                   | 0.506                                     | 0.284                                     | 0.901                                     |                                        |
| Group: PREP.. PLA<br>12                      | 3.051                                     | 0.322                                     | 28.913                                    | 2.26                                   |
| exp(theta)                                   | 3.051                                     | 0.322                                     | 28.913                                    |                                        |
| Group: PREP.. P~3<br>2                       | 1.667                                     | 0.223                                     | 12.459                                    | 2.77                                   |
| exp(theta)                                   | 1.667                                     | 0.223                                     | 12.459                                    |                                        |
| Group: PREP.. P~1<br>2                       | 5.000                                     | 0.242                                     | 103.277                                   | 1.29                                   |
| exp(theta)                                   | 5.000                                     | 0.242                                     | 103.277                                   |                                        |
| Group: PREP.. P~1<br>4                       | 1.539                                     | 0.510                                     | 4.648                                     | 7.59                                   |
| exp(theta)                                   | 1.539                                     | 0.510                                     | 4.648                                     |                                        |
| Group: PREP.. PLA<br>14                      | 0.085                                     | 0.005                                     | 1.513                                     | 1.42                                   |
| exp(theta)                                   | 0.085                                     | 0.005                                     | 1.513                                     |                                        |
| Group: PREP.. P~3<br>8                       | 1.324                                     | 0.027                                     | 65.204                                    | 0.79                                   |
| exp(theta)                                   | 1.324                                     | 0.027                                     | 65.204                                    |                                        |
| Group: PREP.. P~1<br>8                       | 0.973                                     | 0.020                                     | 47.731                                    | 0.79                                   |
| exp(theta)                                   | 0.973                                     | 0.020                                     | 47.731                                    |                                        |
| Group: PREP.. PLA<br>8                       | 0.162                                     | 0.008                                     | 3.250                                     | 1.32                                   |
| exp(theta)                                   | 0.162                                     | 0.008                                     | 3.250                                     |                                        |
| Group: PREP.. P~2<br>7                       | 0.945                                     | 0.458                                     | 1.949                                     | 13.30                                  |
| exp(theta)                                   | 0.945                                     | 0.458                                     | 1.949                                     |                                        |
| Group: PREP.. P~1<br>7                       | 0.733                                     | 0.352                                     | 1.526                                     | 13.11                                  |
| exp(theta)                                   | 0.733                                     | 0.352                                     | 1.526                                     |                                        |
| Overall<br>exp(theta)                        | 0.757                                     | 0.533                                     | 1.076                                     |                                        |

Supplementary Figure S4. Network plot: prosthetic failure (patient)

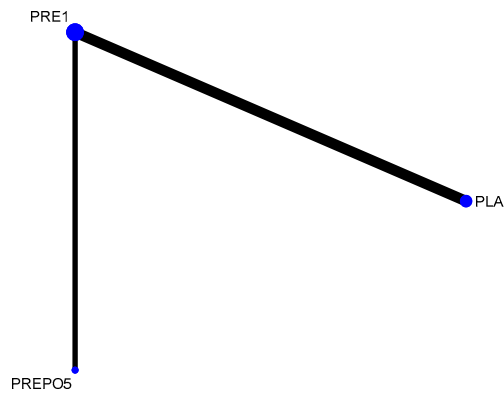

Supplementary Figure S5. SUCRA ranking curve for prosthetic failure (patient)

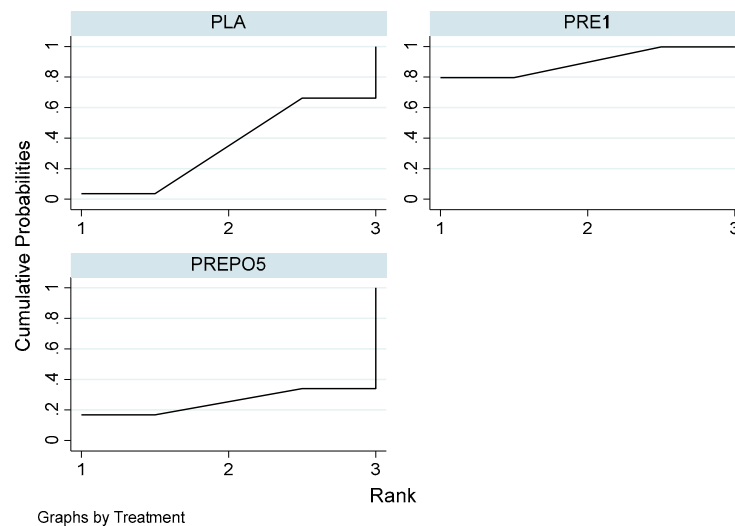

Abbreviations: PLA = placebo/no antibiotics; PRE1 = 2 g amox 1 hr pre-op; PREPO5 = 2 g amox pre-op and 1 g amox postoperative, and 1 g twice a day for 2 days later.

Supplementary Figure S6. League table for prosthetic failure (patient)

|                  |                   |     |
|------------------|-------------------|-----|
| PRE1             |                   |     |
| 0.21 (0.01,4.41) | PREPO5            |     |
| 0.43 (0.17,1.11) | 2.02 (0.08,48.38) | PLA |

Abbreviations: PLA = placebo/no antibiotics; PRE1 = 2 g amox 1 hr pre-op; PREPO5 = 2 g amox pre-op and 1 g amox postoperative, and 1 g twice a day for 2 days later

Supplementary Figure S7. Pairwise meta-analysis for prosthetic failure (patient)

| Study                                        | exp(ES)                                   | [95% conf. interval]                      |                                           | % weight                               |
|----------------------------------------------|-------------------------------------------|-------------------------------------------|-------------------------------------------|----------------------------------------|
| Group: POST.. PLA<br>8                       | 0.122                                     | 0.006                                     | 2.465                                     | 1.31                                   |
| exp(theta)                                   | 0.122                                     | 0.006                                     | 2.465                                     |                                        |
| Group: PRE1.. P~2<br>7                       | 1.289                                     | 0.636                                     | 2.612                                     | 13.66                                  |
| exp(theta)                                   | 1.289                                     | 0.636                                     | 2.612                                     |                                        |
| Group: PRE1.. P~3<br>2<br>8                  | 0.333<br>1.361                            | 0.014<br>0.028                            | 8.118<br>66.990                           | 1.17<br>0.79                           |
| exp(theta)                                   | 0.587                                     | 0.050                                     | 6.931                                     |                                        |
| Group: PRE1.. PLA<br>3<br>8<br>9<br>10<br>13 | 0.300<br>0.167<br>0.532<br>1.019<br>1.029 | 0.156<br>0.008<br>0.214<br>0.149<br>0.390 | 0.575<br>3.339<br>1.322<br>6.968<br>2.715 | 14.90<br>1.32<br>10.01<br>3.01<br>9.18 |
| exp(theta)                                   | 0.506                                     | 0.284                                     | 0.901                                     |                                        |
| Group: PREP.. PLA<br>12                      | 3.051                                     | 0.322                                     | 28.913                                    | 2.26                                   |
| exp(theta)                                   | 3.051                                     | 0.322                                     | 28.913                                    |                                        |
| Group: PREP.. P~3<br>2                       | 1.667                                     | 0.223                                     | 12.459                                    | 2.77                                   |
| exp(theta)                                   | 1.667                                     | 0.223                                     | 12.459                                    |                                        |
| Group: PREP.. P~1<br>2                       | 5.000                                     | 0.242                                     | 103.277                                   | 1.29                                   |
| exp(theta)                                   | 5.000                                     | 0.242                                     | 103.277                                   |                                        |
| Group: PREP.. P~1<br>4                       | 1.539                                     | 0.510                                     | 4.648                                     | 7.59                                   |
| exp(theta)                                   | 1.539                                     | 0.510                                     | 4.648                                     |                                        |
| Group: PREP.. PLA<br>14                      | 0.085                                     | 0.005                                     | 1.513                                     | 1.42                                   |
| exp(theta)                                   | 0.085                                     | 0.005                                     | 1.513                                     |                                        |
| Group: PREP.. P~3<br>8                       | 1.324                                     | 0.027                                     | 65.204                                    | 0.79                                   |
| exp(theta)                                   | 1.324                                     | 0.027                                     | 65.204                                    |                                        |
| Group: PREP.. P~1<br>8                       | 0.973                                     | 0.020                                     | 47.731                                    | 0.79                                   |
| exp(theta)                                   | 0.973                                     | 0.020                                     | 47.731                                    |                                        |
| Group: PREP.. PLA<br>8                       | 0.162                                     | 0.008                                     | 3.250                                     | 1.32                                   |
| exp(theta)                                   | 0.162                                     | 0.008                                     | 3.250                                     |                                        |
| Group: PREP.. P~2<br>7                       | 0.945                                     | 0.458                                     | 1.949                                     | 13.30                                  |
| exp(theta)                                   | 0.945                                     | 0.458                                     | 1.949                                     |                                        |
| Group: PREP.. P~1<br>7                       | 0.733                                     | 0.352                                     | 1.526                                     | 13.11                                  |
| exp(theta)                                   | 0.733                                     | 0.352                                     | 1.526                                     |                                        |
| Overall<br>exp(theta)                        | 0.757                                     | 0.533                                     | 1.076                                     |                                        |

Supplementary Figure S8. Network plot: postsurgical complications

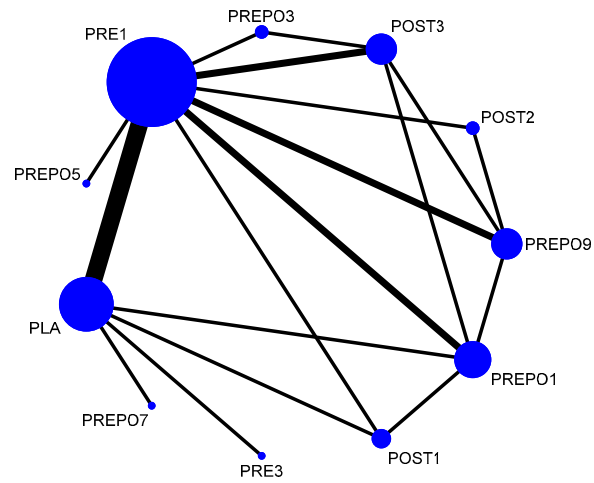

Abbreviations: PLA = placebo/no antibiotics; PRE1 = 2 g amox 1 hr pre-op; PRE3 = 3 g amox 1 hr pre-op; POST1 = 2 g amox immediately post-op; POST2 = post-op amox with clavulanic acid 625 mg 3x daily for 5 days; POST3 = 500 mg q 8 h for 5 days post-op/postoperative amox 1 g twice a day for 1 week after surgery; PREPO1 = 2 g amox pre-op and 500 mg amox post-op for 3 days; PREPO3 = 2 g amox 1 hr pre-op, 500 m g q 8 h for 5 days; PREPO5 = 2 g amox pre-op and 1 g amox postoperative, and 1 g twice a day for 2 days later; PREPO7 = 1 g amox 1 hr pre-op and 500 mg 4x daily for 2 days post-op; PREPO9 = 2 g amox 1 hr pre-op, followed by postoperative 500 mg thrice for 5 days

Supplementary Figure S9. SUCRA ranking curve for postsurgical complications

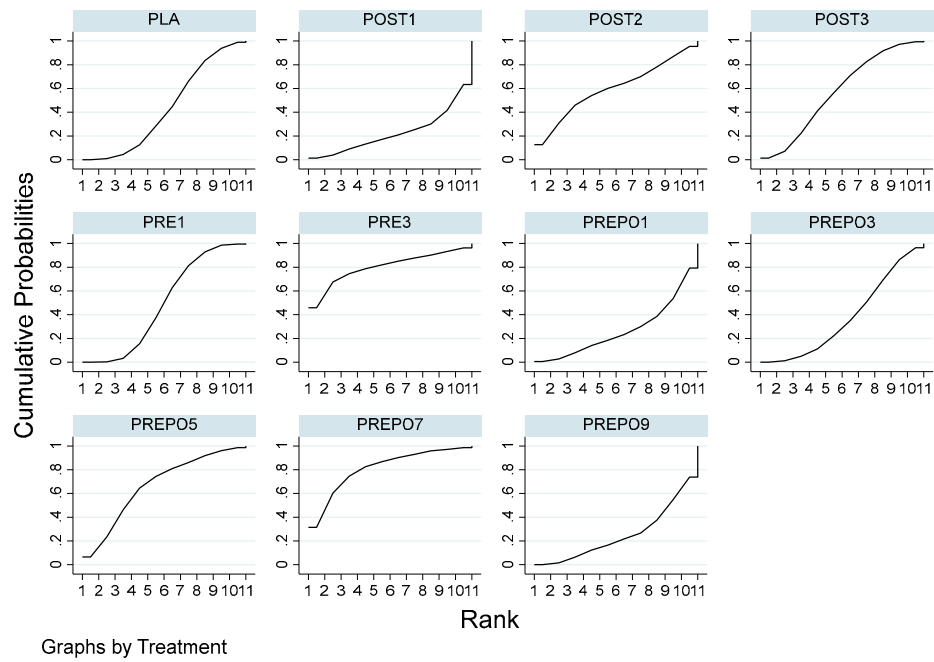

Abbreviations: PLA = placebo/no antibiotics; PRE1 = 2 g amox 1 hr pre-op; PRE3 = 3 g amox 1 hr pre-op; POST1 = 2 g amox immediately post-op; POST2=post-op amox with clavulanic acid 625 mg 3x daily for 5 days; POST3 = 500 mg q 8 h for 5 days post-op/postoperative amox 1 g twice a day for 1 week after surgery; PREPO1 = 2 g amox pre-op and 500 mg amox post-op for 3 days; PREPO3 = 2 g amox 1 hr pre-op, 500 mg q 8 h for 5 days; PREPO5 = 2 g amox pre-op and 1 g amox postoperative, and 1 g twice a day for 2 days later; PREPO7 = 1 g amox 1 hr pre-op and 500 mg 4x daily for 2 days post-op; PREPO9 = 2 g amox 1 hr pre-op, followed by postoperative 500 mg thrice for 5 days

Supplementary Figure S10. League table for postsurgical complications

|                        |                       |                      |                      |                      |                       |                      |                      |                     |                      |             |
|------------------------|-----------------------|----------------------|----------------------|----------------------|-----------------------|----------------------|----------------------|---------------------|----------------------|-------------|
| POST1                  |                       |                      |                      |                      |                       |                      |                      |                     |                      |             |
| 3.73<br>(0.12,115.22)  | POST2                 |                      |                      |                      |                       |                      |                      |                     |                      |             |
| 3.03<br>(0.25,36.64)   | 0.81<br>(0.05,12.23)  | POST3                |                      |                      |                       |                      |                      |                     |                      |             |
| 2.51<br>(0.24,26.25)   | 0.67<br>(0.05,8.89)   | 0.83<br>(0.33,2.09)  | PRE1                 |                      |                       |                      |                      |                     |                      |             |
| 11.00<br>(0.24,497.79) | 2.95<br>(0.05,159.12) | 3.63<br>(0.15,87.22) | 4.39<br>(0.21,91.92) | PRE3                 |                       |                      |                      |                     |                      |             |
| 1.20<br>(0.14,10.41)   | 0.32<br>(0.01,7.58)   | 0.40<br>(0.05,3.39)  | 0.48<br>(0.07,3.54)  | 0.11<br>(0.00,4.06)  | PREPO1                |                      |                      |                     |                      |             |
| 2.00<br>(0.17,23.89)   | 0.54<br>(0.04,7.99)   | 0.66<br>(0.27,1.63)  | 0.80<br>(0.34,1.85)  | 0.18<br>(0.01,4.26)  | 1.66<br>(0.19,14.14)  | PREPO3               |                      |                     |                      |             |
| 4.01<br>(0.28,57.28)   | 1.07<br>(0.06,18.92)  | 1.32<br>(0.28,6.25)  | 1.60<br>(0.46,5.57)  | 0.36<br>(0.01,9.77)  | 3.33<br>(0.32,35.11)  | 2.01<br>(0.45,9.05)  | PREPO5               |                     |                      |             |
| 9.11<br>(0.37,221.98)  | 2.44<br>(0.08,73.28)  | 3.01<br>(0.27,33.19) | 3.64<br>(0.40,33.37) | 0.83<br>(0.02,32.93) | 7.57<br>(0.40,144.99) | 4.57<br>(0.43,48.91) | 2.27<br>(0.18,28.93) | PREPO7              |                      |             |
| 1.20<br>(0.07,21.58)   | 0.32<br>(0.03,2.95)   | 0.39<br>(0.05,2.95)  | 0.48<br>(0.08,3.02)  | 0.11<br>(0.00,3.81)  | 0.99<br>(0.08,12.69)  | 0.60<br>(0.08,4.46)  | 0.30<br>(0.03,2.77)  | 0.13<br>(0.01,2.34) | PREPO9               |             |
| 2.28<br>(0.21,24.21)   | 0.61<br>(0.04,8.54)   | 0.75<br>(0.26,2.20)  | 0.91<br>(0.52,1.58)  | 0.21<br>(0.01,4.13)  | 1.89<br>(0.25,14.36)  | 1.14<br>(0.42,3.12)  | 0.57<br>(0.15,2.22)  | 0.25<br>(0.03,2.14) | 1.91<br>(0.28,13.02) | P<br>L<br>A |

Abbreviations: PLA = placebo/no antibiotics; PRE1 = 2 g amox 1 hr pre-op; PRE3 = 3 g amox 1 hr pre-op; POST1 = 2 g amox immediately post-op; POST2 = post-op amox with clavulanic acid 625 mg 3x daily for 5 days; POST3 = 500 mg q 8 h for 5 days post-op/postoperative amox 1 g twice a day for 1 week after surgery; PREPO1 = 2 g amox pre-op and 500 mg amox post-op for 3 days; PREPO3 = 2 g amox 1 hr pre-op, 500 mg q 8 h for 5 days; PREPO5 = 2 g amox pre-op and 1 g amox postoperative, and 1 g twice a day for 2 days later; PREPO7 = 1 g amox 1 hr pre-op and 500 mg 4x daily for 2 days post-op; PREPO9 = 2 g amox 1 hr pre-op, followed by postoperative 500 mg thrice for 5 days

Supplementary Figure S11. Pairwise meta-analysis for postsurgical complications

| Study                                         | exp(ES)                                   | [95% conf. interval]                      |                                            | % weight                              |
|-----------------------------------------------|-------------------------------------------|-------------------------------------------|--------------------------------------------|---------------------------------------|
| Group: POST.. PLA<br>6                        | 2.928                                     | 0.121                                     | 70.821                                     | 1.05                                  |
| exp(theta)                                    | 2.928                                     | 0.121                                     | 70.821                                     |                                       |
| Group: PRE1.. P~1<br>6                        | 0.337                                     | 0.014                                     | 8.162                                      | 1.05                                  |
| exp(theta)                                    | 0.337                                     | 0.014                                     | 8.162                                      |                                       |
| Group: PRE1.. P~2<br>7                        | 1.205                                     | 0.077                                     | 18.940                                     | 1.40                                  |
| exp(theta)                                    | 1.205                                     | 0.077                                     | 18.940                                     |                                       |
| Group: PRE1.. P~3<br>2<br>8                   | 1.286<br>1.000                            | 0.492<br>0.021                            | 3.363<br>48.524                            | 11.52<br>0.71                         |
| exp(theta)                                    | 1.267                                     | 0.498                                     | 3.222                                      |                                       |
| Group: PRE1.. PLA<br>6<br>9<br>10<br>11<br>13 | 0.988<br>0.733<br>1.019<br>1.750<br>0.395 | 0.020<br>0.300<br>0.351<br>0.523<br>0.077 | 49.186<br>1.792<br>2.956<br>5.860<br>2.016 | 0.70<br>13.32<br>9.39<br>7.29<br>4.01 |
| exp(theta)                                    | 0.901                                     | 0.518                                     | 1.568                                      |                                       |
| Group: PRE3.. PLA<br>5                        | 0.207                                     | 0.010                                     | 4.126                                      | 1.19                                  |
| exp(theta)                                    | 0.207                                     | 0.010                                     | 4.126                                      |                                       |
| Group: PREP.. P~1<br>6                        | 0.954                                     | 0.101                                     | 8.989                                      | 2.12                                  |
| exp(theta)                                    | 0.954                                     | 0.101                                     | 8.989                                      |                                       |
| Group: PREP.. P~3<br>8                        | 1.000                                     | 0.021                                     | 48.524                                     | 0.71                                  |
| exp(theta)                                    | 1.000                                     | 0.021                                     | 48.524                                     |                                       |
| Group: PREP.. P~1<br>6<br>8                   | 2.828<br>1.000                            | 0.117<br>0.021                            | 68.428<br>48.524                           | 1.05<br>0.71                          |
| exp(theta)                                    | 1.861                                     | 0.159                                     | 21.845                                     |                                       |
| Group: PREP.. PLA<br>6                        | 2.793                                     | 0.115                                     | 67.587                                     | 1.05                                  |
| exp(theta)                                    | 2.793                                     | 0.115                                     | 67.587                                     |                                       |
| Group: PREP.. P~3<br>2                        | 1.571                                     | 0.626                                     | 3.944                                      | 12.57                                 |
| exp(theta)                                    | 1.571                                     | 0.626                                     | 3.944                                      |                                       |
| Group: PREP.. P~1<br>2                        | 1.222                                     | 0.522                                     | 2.863                                      | 14.69                                 |
| exp(theta)                                    | 1.222                                     | 0.522                                     | 2.863                                      |                                       |
| Group: PREP.. P~1<br>4                        | 0.625                                     | 0.180                                     | 2.176                                      | 6.84                                  |
| exp(theta)                                    | 0.625                                     | 0.180                                     | 2.176                                      |                                       |
| Group: PREP.. PLA<br>14                       | 0.250                                     | 0.029                                     | 2.140                                      | 2.31                                  |
| exp(theta)                                    | 0.250                                     | 0.029                                     | 2.140                                      |                                       |
| Group: PREP.. P~2<br>7                        | 3.342                                     | 0.355                                     | 31.475                                     | 2.12                                  |
| exp(theta)                                    | 3.342                                     | 0.355                                     | 31.475                                     |                                       |
| Group: PREP.. P~3<br>8                        | 1.000                                     | 0.021                                     | 48.524                                     | 0.71                                  |
| exp(theta)                                    | 1.000                                     | 0.021                                     | 48.524                                     |                                       |
| Group: PREP.. P~1<br>7<br>8                   | 2.772<br>1.000                            | 0.295<br>0.021                            | 26.058<br>48.524                           | 2.12<br>0.71                          |
| exp(theta)                                    | 2.149                                     | 0.309                                     | 14.961                                     |                                       |
| Group: PREP.. PR~1<br>8                       | 1.000                                     | 0.021                                     | 48.524                                     | 0.71                                  |
| exp(theta)                                    | 1.000                                     | 0.021                                     | 48.524                                     |                                       |
| Overall<br>exp(theta)                         | 1.069                                     | 0.771                                     | 1.481                                      |                                       |

Supplementary Figure S12. Network plot: adverse effect

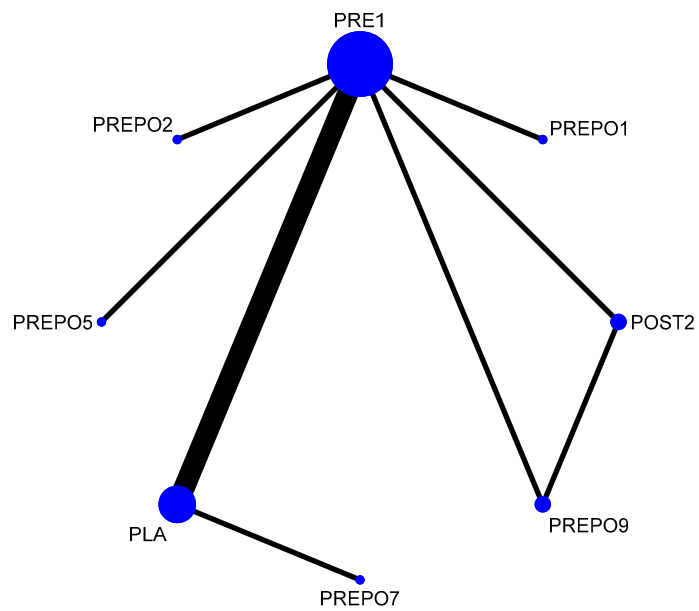

Abbreviations: PLA = placebo/no antibiotics; PRE1 = 2 g amox 1 hr pre-op; POST2 = post-op amox with clavulanic acid 625 mg 3x daily for 5 days; PREPO1 = 2 g amox pre-op and 500 mg amox post-op for 3 days; PREPO2 = 2 g amox 1 hr pre-op followed by 500 mg three times for 7 days; PREPO5 = 2 g amox pre-op and 1 g amox postoperative, and 1 g twice a day for 2 days later; PREPO7 = 1 g amox 1 hr pre-op and 500 mg 4x daily for 2 days post-op; PREPO9 = 2 g amox 1 hr pre-op, followed by postoperative 500 mg thrice for 5 days

Supplementary Figure S13. SUCRA ranking curve for adverse effect

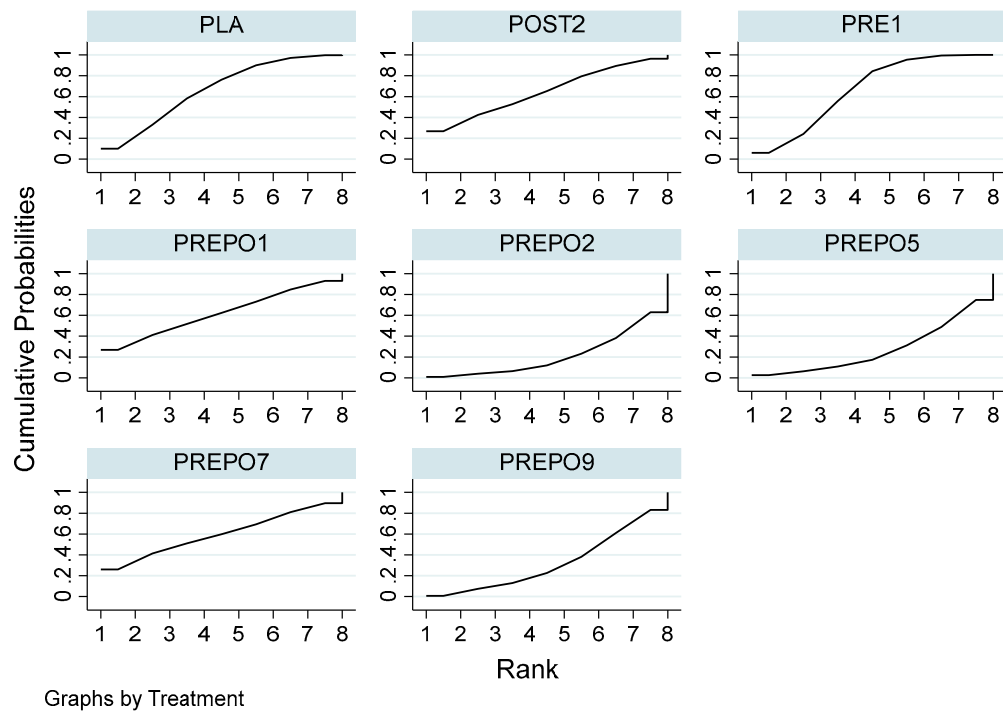

Abbreviations: PLA = placebo/no antibiotics; PRE1 = 2 g amox 1 hr pre-op; POST2 = post-op amox with clavulanic acid 625 mg 3x daily for 5 days; PREPO1 = 2 g amox pre-op and 500 mg amox post-op for 3 days; PREPO2 = 2 g amox 1 hr pre-op followed by 500 mg three times for 7 days; PREPO5 = 2 g amox pre-op and 1 g amox postoperative, and 1 g twice a day for 2 days later; PREPO7 = 1 g amox 1 hr pre-op and 500 mg 4x daily for 2 days post-op; PREPO9 = 2 g amox 1 hr pre-op, followed by postoperative 500 mg thrice for 5 days

Supplementary Figure S14. League table for adverse effect

|                       |                      |                       |                         |                        |                      |                       |         |
|-----------------------|----------------------|-----------------------|-------------------------|------------------------|----------------------|-----------------------|---------|
| POST2                 |                      |                       |                         |                        |                      |                       |         |
| 0.83<br>(0.02,41.40)  | PRE1                 |                       |                         |                        |                      |                       |         |
| 0.83<br>(0.00,205.13) | 1.00<br>(0.02,48.52) | PREPO1                |                         |                        |                      |                       |         |
| 0.08<br>(0.00,10.55)  | 0.10<br>(0.01,1.76)  | 0.10<br>(0.00,12.43)  | PREPO2                  |                        |                      |                       |         |
| 0.13<br>(0.00,17.00)  | 0.15<br>(0.01,2.93)  | 0.15<br>(0.00,20.03)  | 1.54<br>(0.02,95.69)    | PREPO5                 |                      |                       |         |
| 0.83<br>(0.00,272.19) | 1.00<br>(0.01,71.73) | 1.00<br>(0.00,321.74) | 10.15<br>(0.06,1753.57) | 6.58<br>(0.04,1185.73) | PREPO7               |                       |         |
| 0.18<br>(0.01,3.69)   | 0.22<br>(0.01,4.43)  | 0.22<br>(0.00,29.57)  | 2.19<br>(0.03,142.31)   | 1.42<br>(0.02,97.14)   | 0.22<br>(0.00,40.29) | PREPO9                |         |
| 0.83<br>(0.01,60.29)  | 1.00<br>(0.17,5.76)  | 1.00<br>(0.01,70.83)  | 10.15<br>(0.35,295.47)  | 6.58<br>(0.21,204.13)  | 1.00<br>(0.02,49.20) | 4.64<br>(0.14,151.95) | PL<br>A |

Abbreviations : PLA = placebo/no antibiotics; PRE1 = 2 g amox 1 hr pre-op; POST2 = post-op amox with clavulanic acid 625 mg 3x daily for 5 days; PREPO1 = 2 g amox pre-op and 500 mg amox post-op for 3 days; PREPO2 = 2 g amox 1 hr pre-op followed by 500 mg three times for 7 days; PREPO5 = 2 g amox pre-op and 1 g amox postoperative, and 1 g twice a day for 2 days later; PREPO7 = 1 g amox 1 hr pre-op and 500 mg 4x daily for 2 days post-op; PREPO9 = 2 g amox 1 hr pre-op, followed by postoperative 500 mg thrice for 5 days

Supplementary Figure S15. Pairwise meta-analysis for adverse effects

| Study                   | exp(ES) | [95% conf. interval] |         | % weight |
|-------------------------|---------|----------------------|---------|----------|
| Group: PRE1.. P~2<br>7  | 1.203   | 0.024                | 59.881  | 6.69     |
| exp(theta)              | 1.203   | 0.024                | 59.881  |          |
| Group: PRE1.. PLA<br>9  | 1.008   | 0.020                | 50.600  | 6.66     |
| 10                      | 1.019   | 0.021                | 50.413  | 6.71     |
| 11                      | 1.000   | 0.063                | 15.848  | 13.38    |
| 13                      | 0.987   | 0.020                | 49.559  | 6.66     |
| exp(theta)              | 1.003   | 0.175                | 5.762   |          |
| Group: PREP.. P~1<br>8  | 1.000   | 0.021                | 48.524  | 6.78     |
| exp(theta)              | 1.000   | 0.021                | 48.524  |          |
| Group: PREP.. P~1<br>15 | 10.125  | 0.567                | 180.853 | 12.29    |
| exp(theta)              | 10.125  | 0.567                | 180.853 |          |
| Group: PREP.. P~1<br>4  | 6.567   | 0.342                | 126.188 | 11.69    |
| exp(theta)              | 6.567   | 0.342                | 126.188 |          |
| Group: PREP.. PLA<br>14 | 1.000   | 0.020                | 49.203  | 6.73     |
| exp(theta)              | 1.000   | 0.020                | 49.203  |          |
| Group: PREP.. P~2<br>7  | 5.562   | 0.271                | 114.132 | 11.19    |
| exp(theta)              | 5.562   | 0.271                | 114.132 |          |
| Group: PREP.. P~1<br>7  | 4.625   | 0.226                | 94.759  | 11.20    |
| exp(theta)              | 4.625   | 0.226                | 94.759  |          |
| Overall<br>exp(theta)   | 2.415   | 0.879                | 6.635   |          |

## Heterogeneity summary

| Group          | df | Q    | P > Q | tau2  | % I2 | H2   |
|----------------|----|------|-------|-------|------|------|
| PRE1 vs. PO~2  | 0  | 0.00 | .     | 0.000 | .    | .    |
| PRE1 vs. PLA   | 3  | 0.00 | 1.000 | 0.000 | 0.00 | 1.00 |
| PREP01 .. P~1  | 0  | 0.00 | .     | 0.000 | .    | .    |
| PREP02 .. P~1  | 0  | 0.00 | .     | 0.000 | .    | .    |
| PREP05 .. P~1  | 0  | 0.00 | .     | 0.000 | .    | .    |
| PREP07 vs. PLA | 0  | 0.00 | .     | 0.000 | .    | .    |
| PREP09 .. P~2  | 0  | 0.00 | .     | 0.000 | .    | .    |
| PREP09 .. P~1  | 0  | 0.00 | .     | 0.000 | .    | .    |
| Overall        | 10 | 3.35 | 0.972 | 0.000 | 0.00 | 1.00 |

Test of group differences:  $Q_b = \text{chi2}(7) = 3.35$ Prob >  $Q_b = 0.851$

**Supplementary Figure S16.** Comparison-adjusted funnel plot for implant failure (patient)

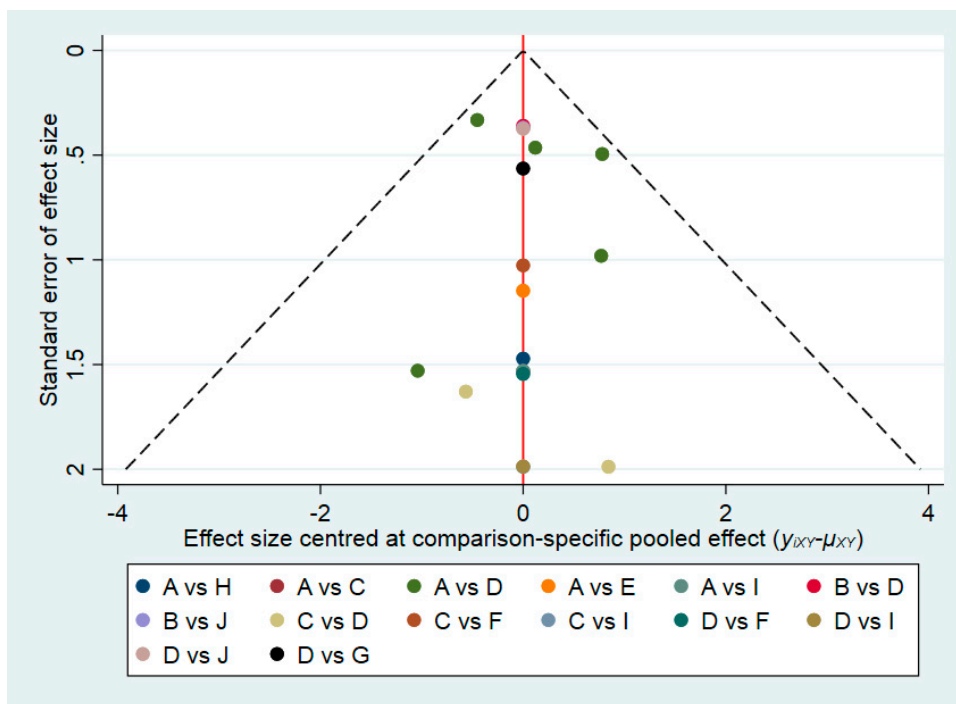

**Supplementary Figure S17.** Comparison-adjusted funnel plot for implant failure (per implant data)

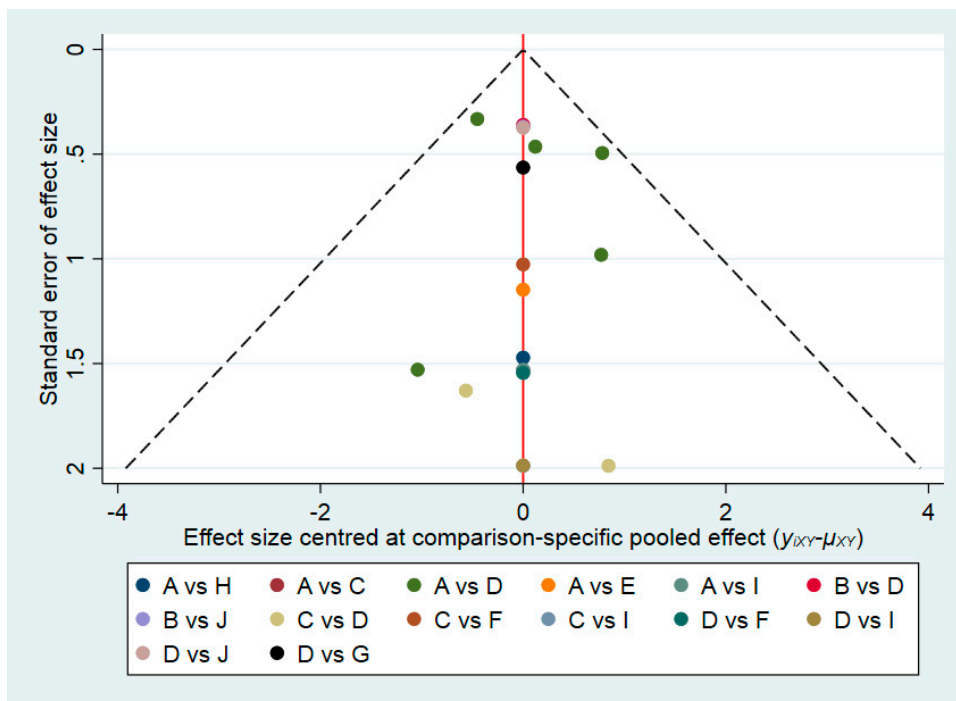

Supplementary Figure S18. Comparison-adjusted funnel plot for prosthetic failure

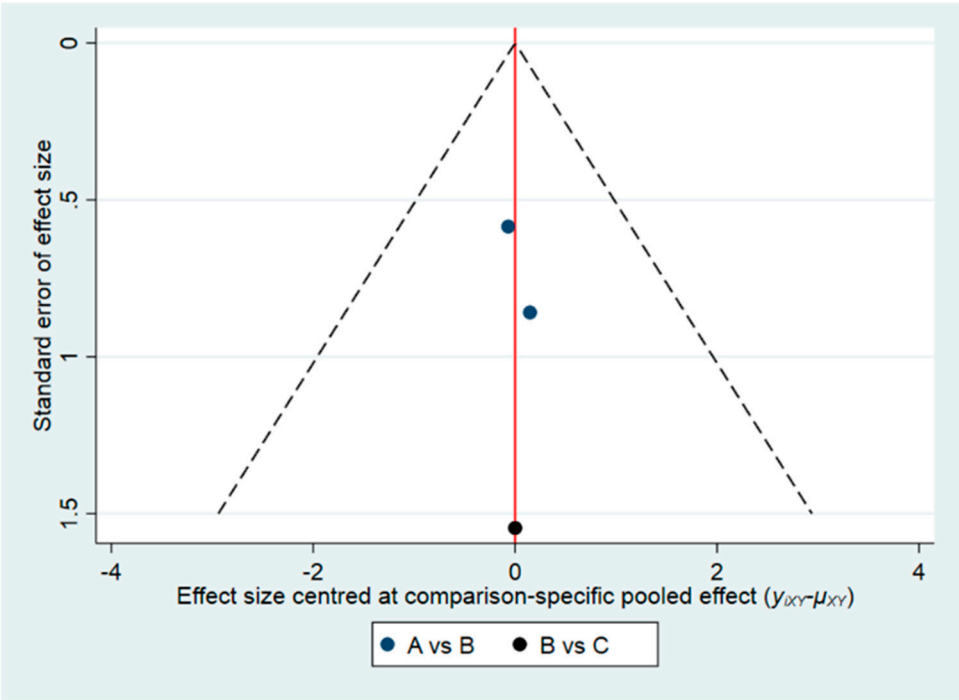

Supplementary Figure S19. Comparison-adjusted funnel plot for postsurgical complications

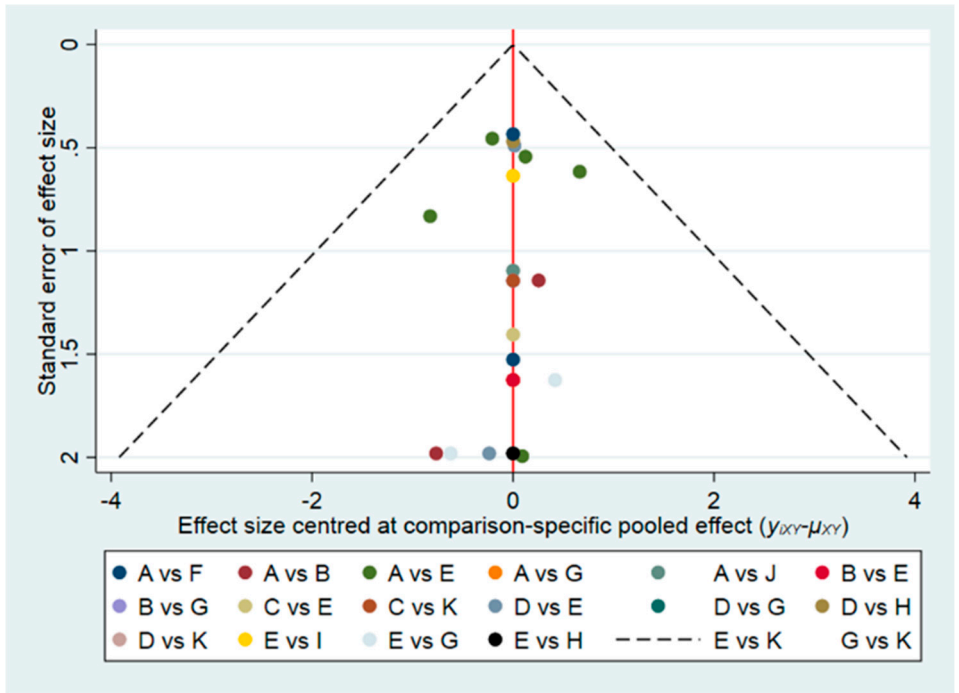

Supplementary Figure S20. Comparison-adjusted funnel plot for adverse effects

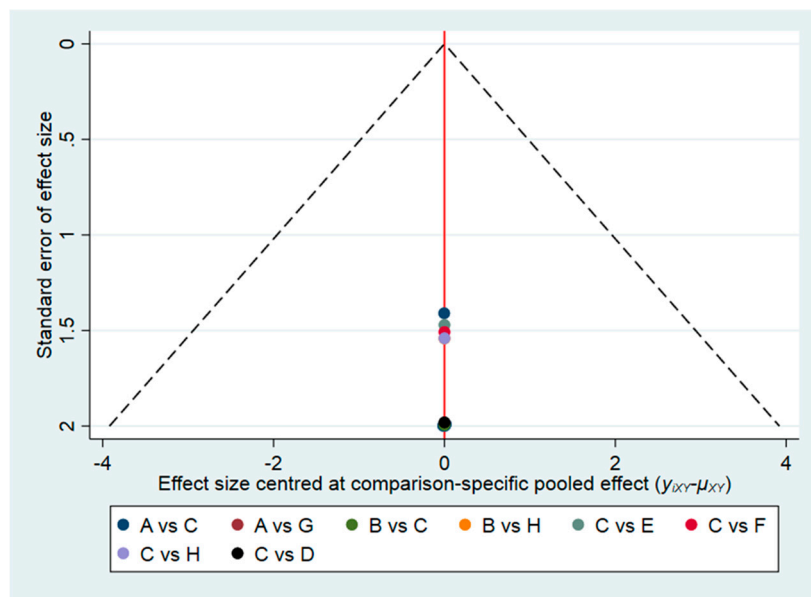

Supplement: s1 [file s1]
